# Supplementary material for: High pressure structural behaviour of 5,5′-bitetrazole-1,1′-diolate based energetic materials: a comparative study from first principles calculations
Source: Royal Society of Chemistry journal article supplement (doi:10.1039/d0ra04782a), 2020-01-01
Supplement: d0ra04782a1.pdf [file d0ra04782a1.pdf]

## Supplementary Information

# High pressure structural behaviour of 5, 5'-bitetrazole-1,1'-diolate based energetic materials: a comparative study from first principles calculations

B. Moses Abraham\*

Advanced Centre of Research in High Energy Materials (ACRHEM), University of Hyderabad, Prof. C. R. Rao Road, Gachibowli, Hyderabad-500046, Telangana, India.

\*E-mail: mosesabrahamb@gmail.com

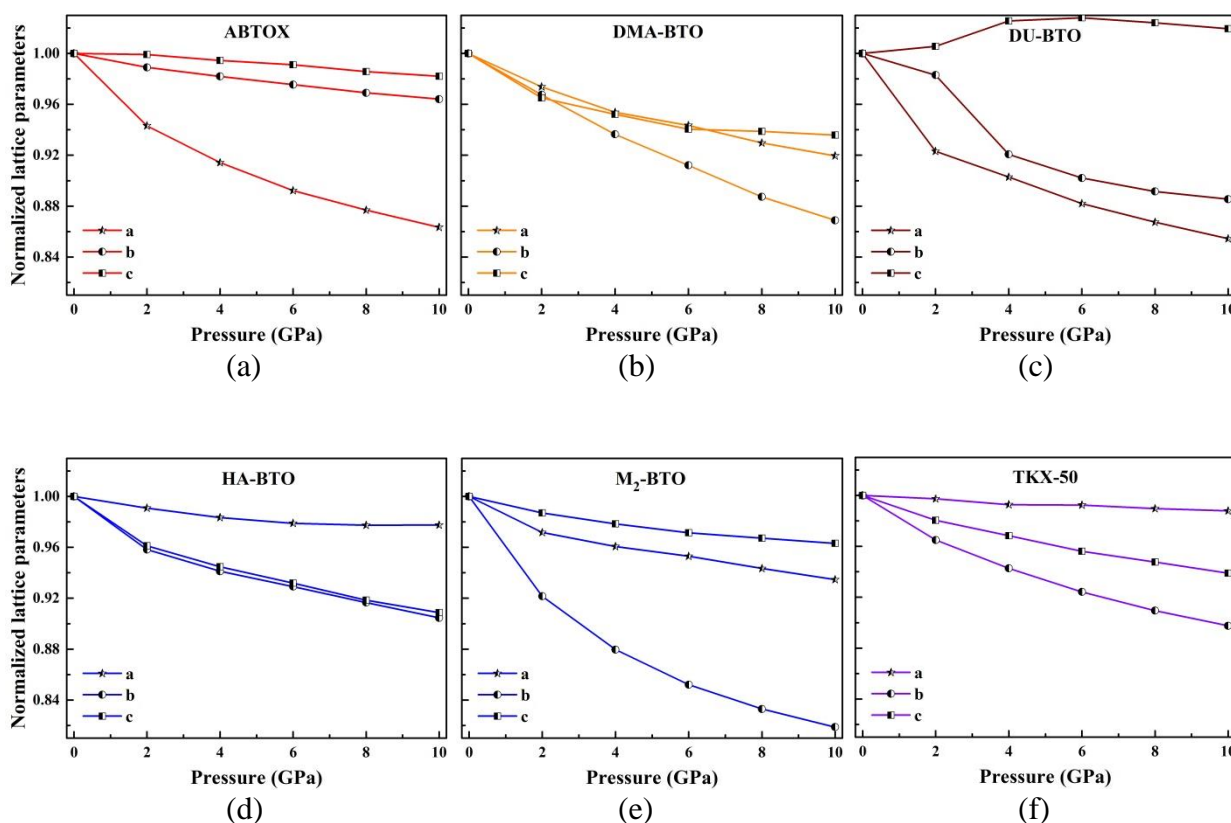

Fig. S1. Normalized lattice parameters under progressing pressure for (a) ABTOX, (b) DMA-BTO, (c) DU-BTO, (d) HA-BTO, (e) M<sub>2</sub>-BTO and (f) TKX-50.

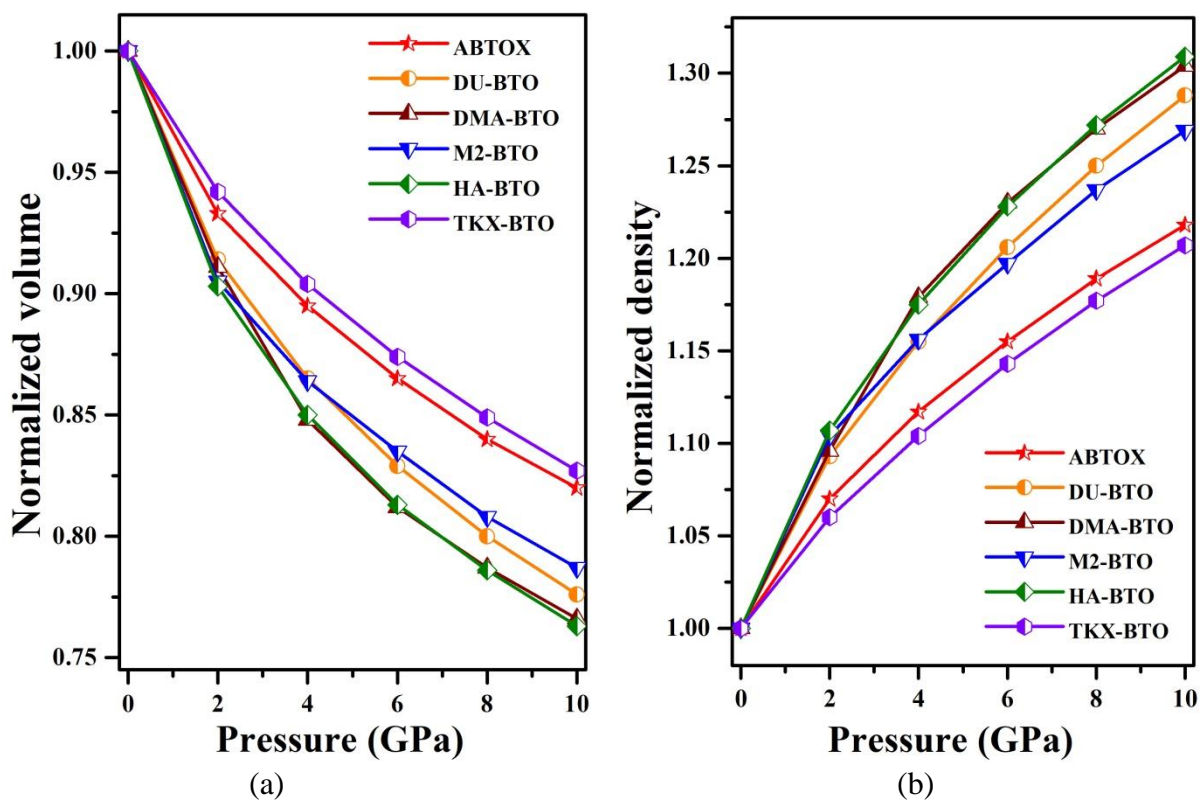

Fig. S2. Normalized (a) volume and (b) density as a function of pressure for the studied six BTO- based energetic materials.

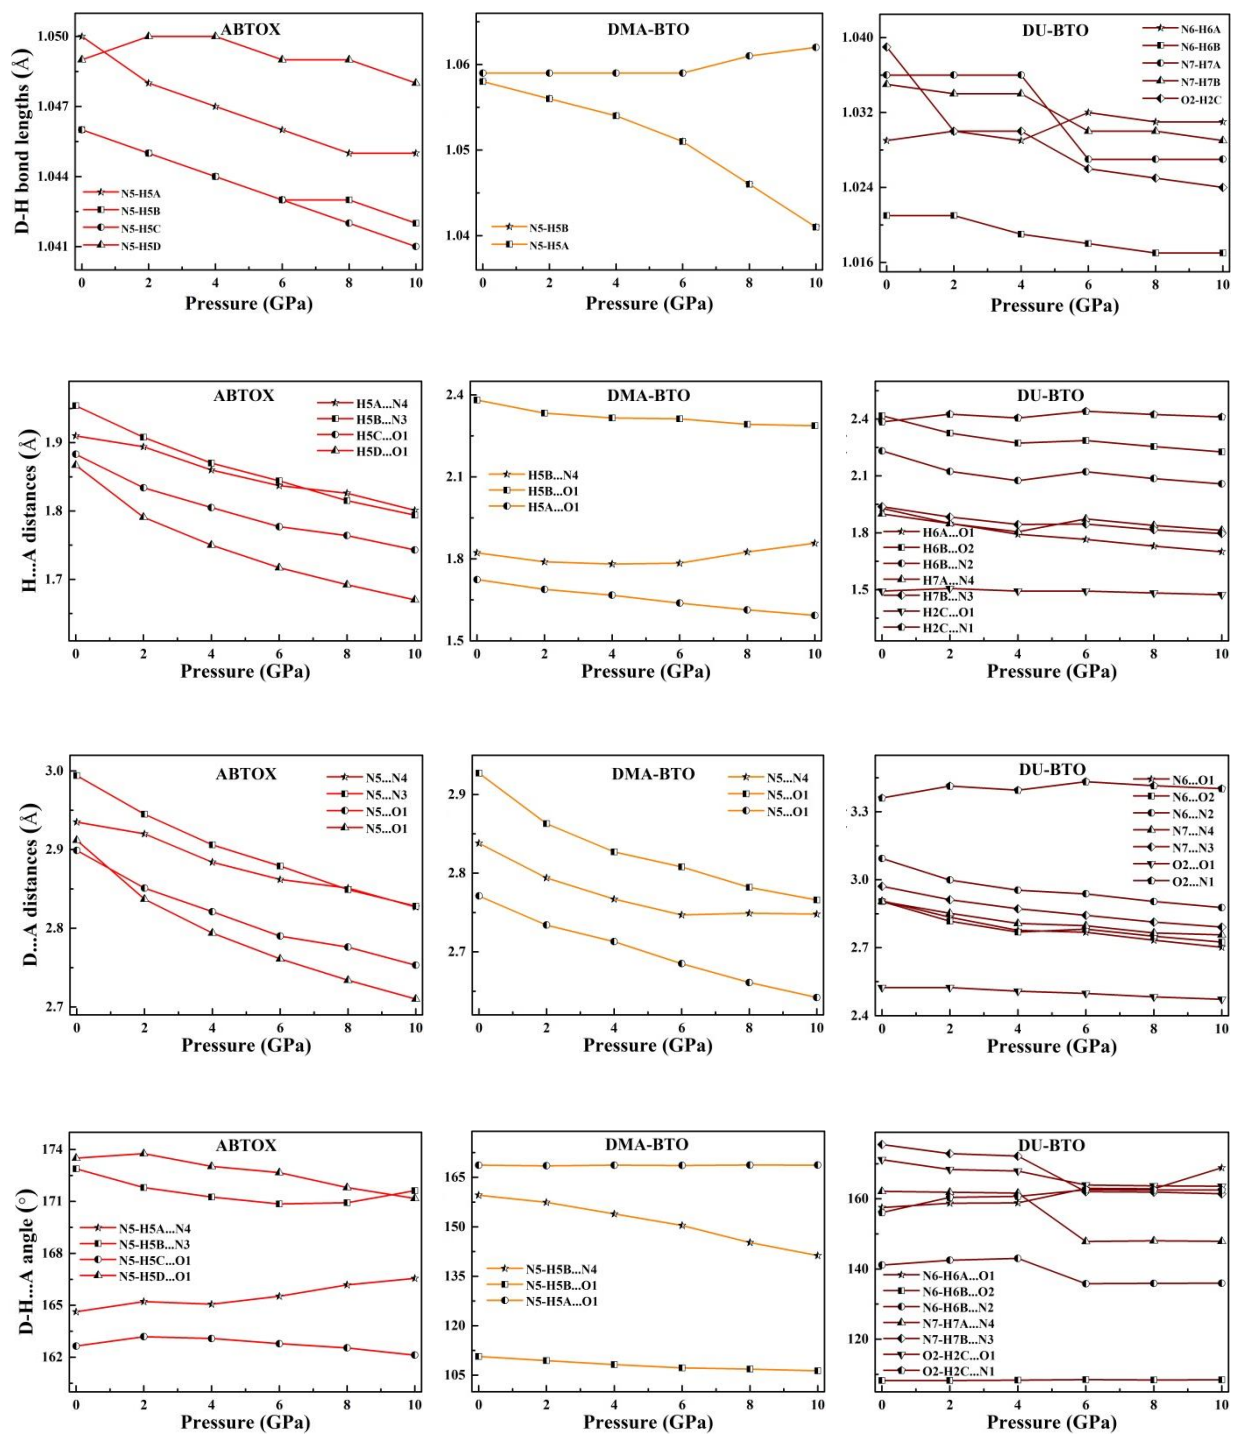

(a)

(b)

(c)

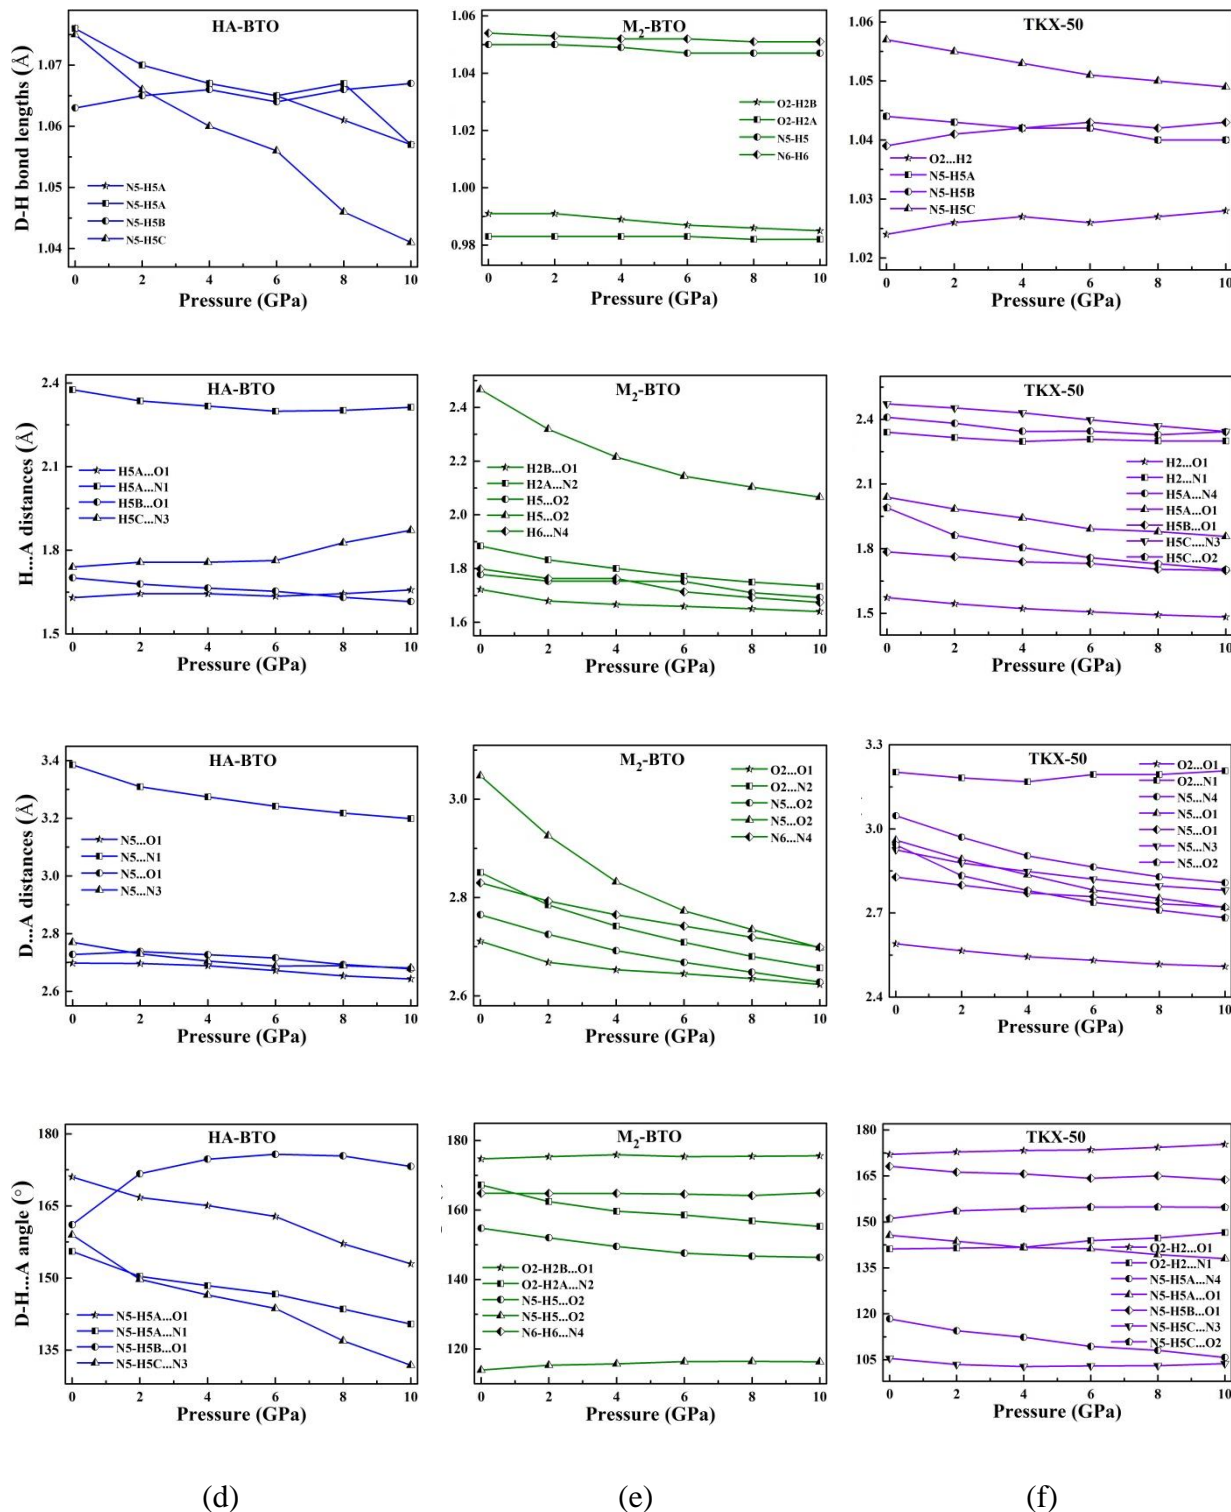

Fig. S3. Calculated intramolecular D-H bond length, intermolecular D...H and H...A distances, and D-H...A bond angle as a function of pressure for (a) ABTOX, (b) DMA-BTO, (c) DU-BTO, (d) HA-BTO, (e) M<sub>2</sub>-BTO and (f) TKX-50.

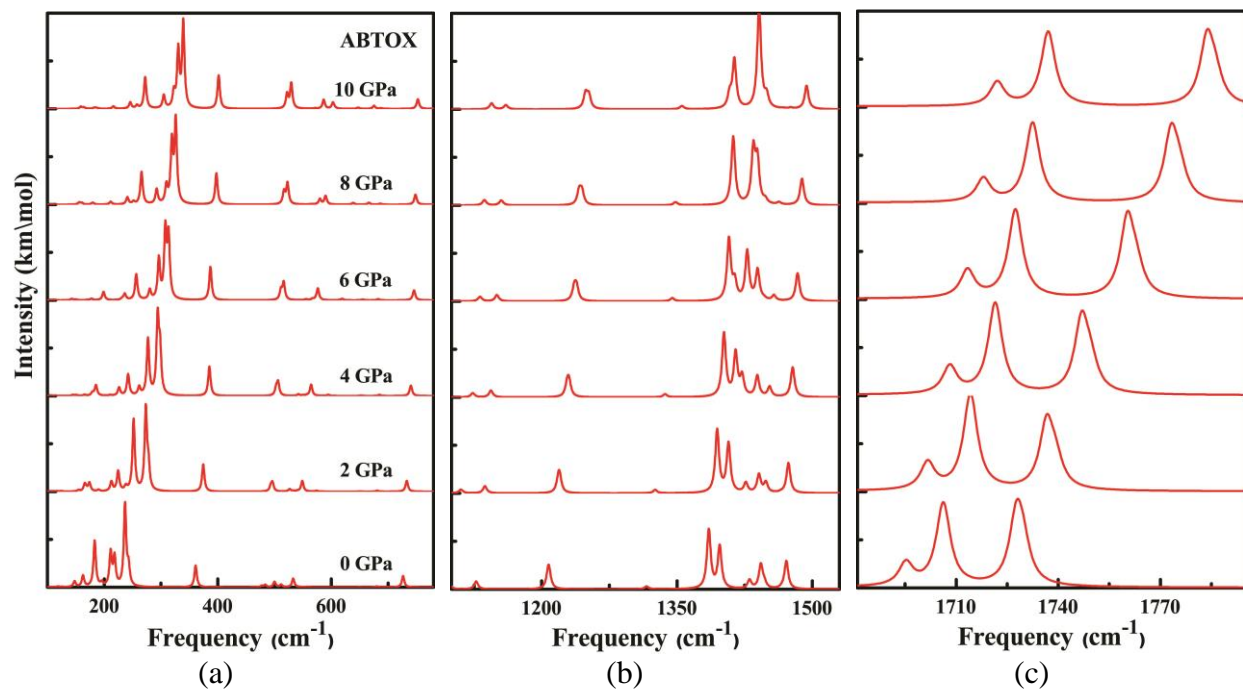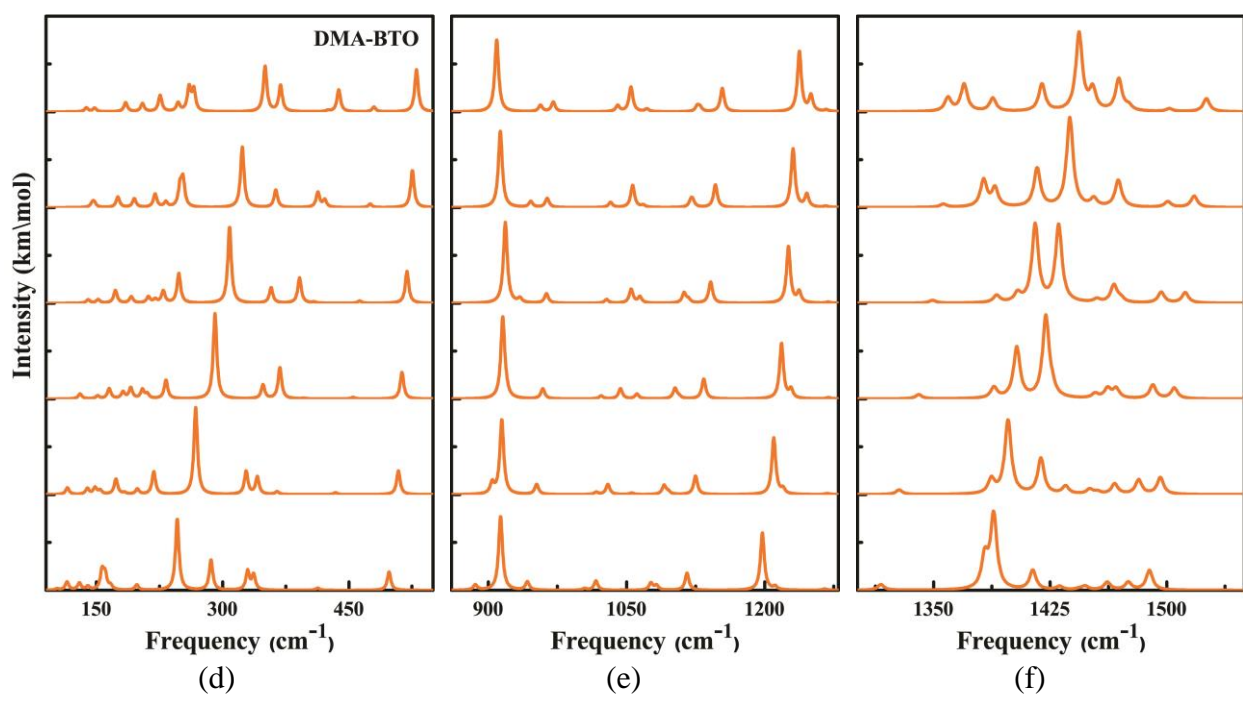

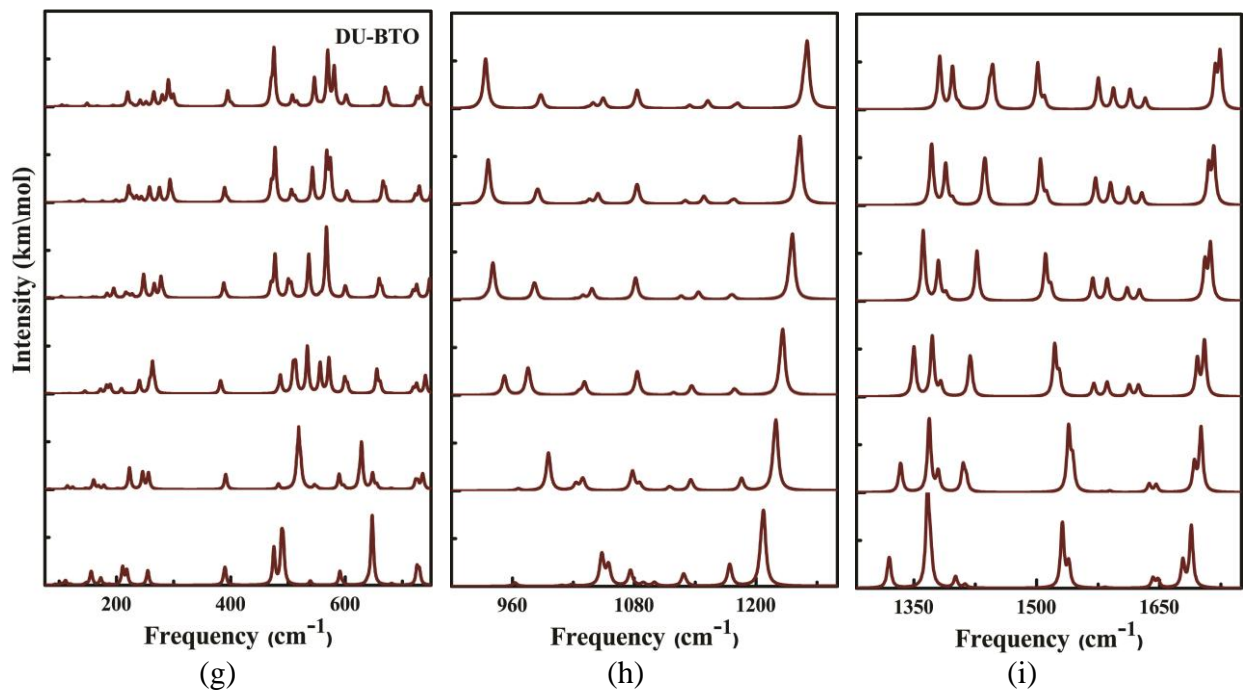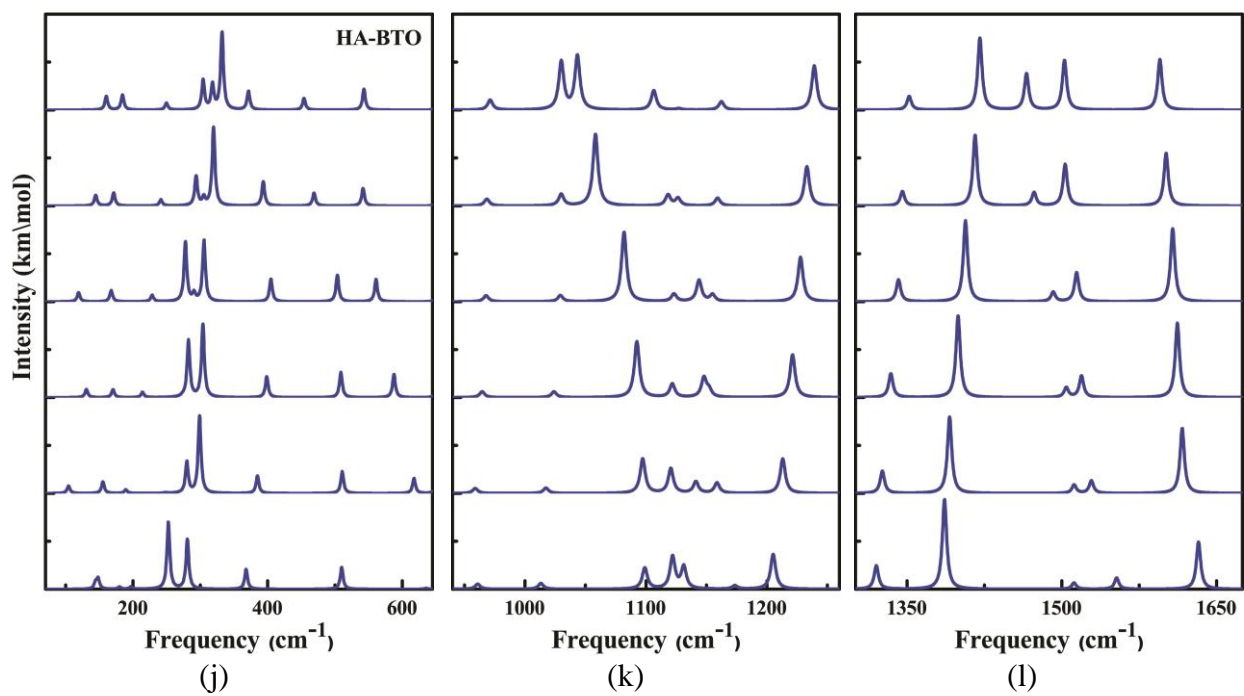

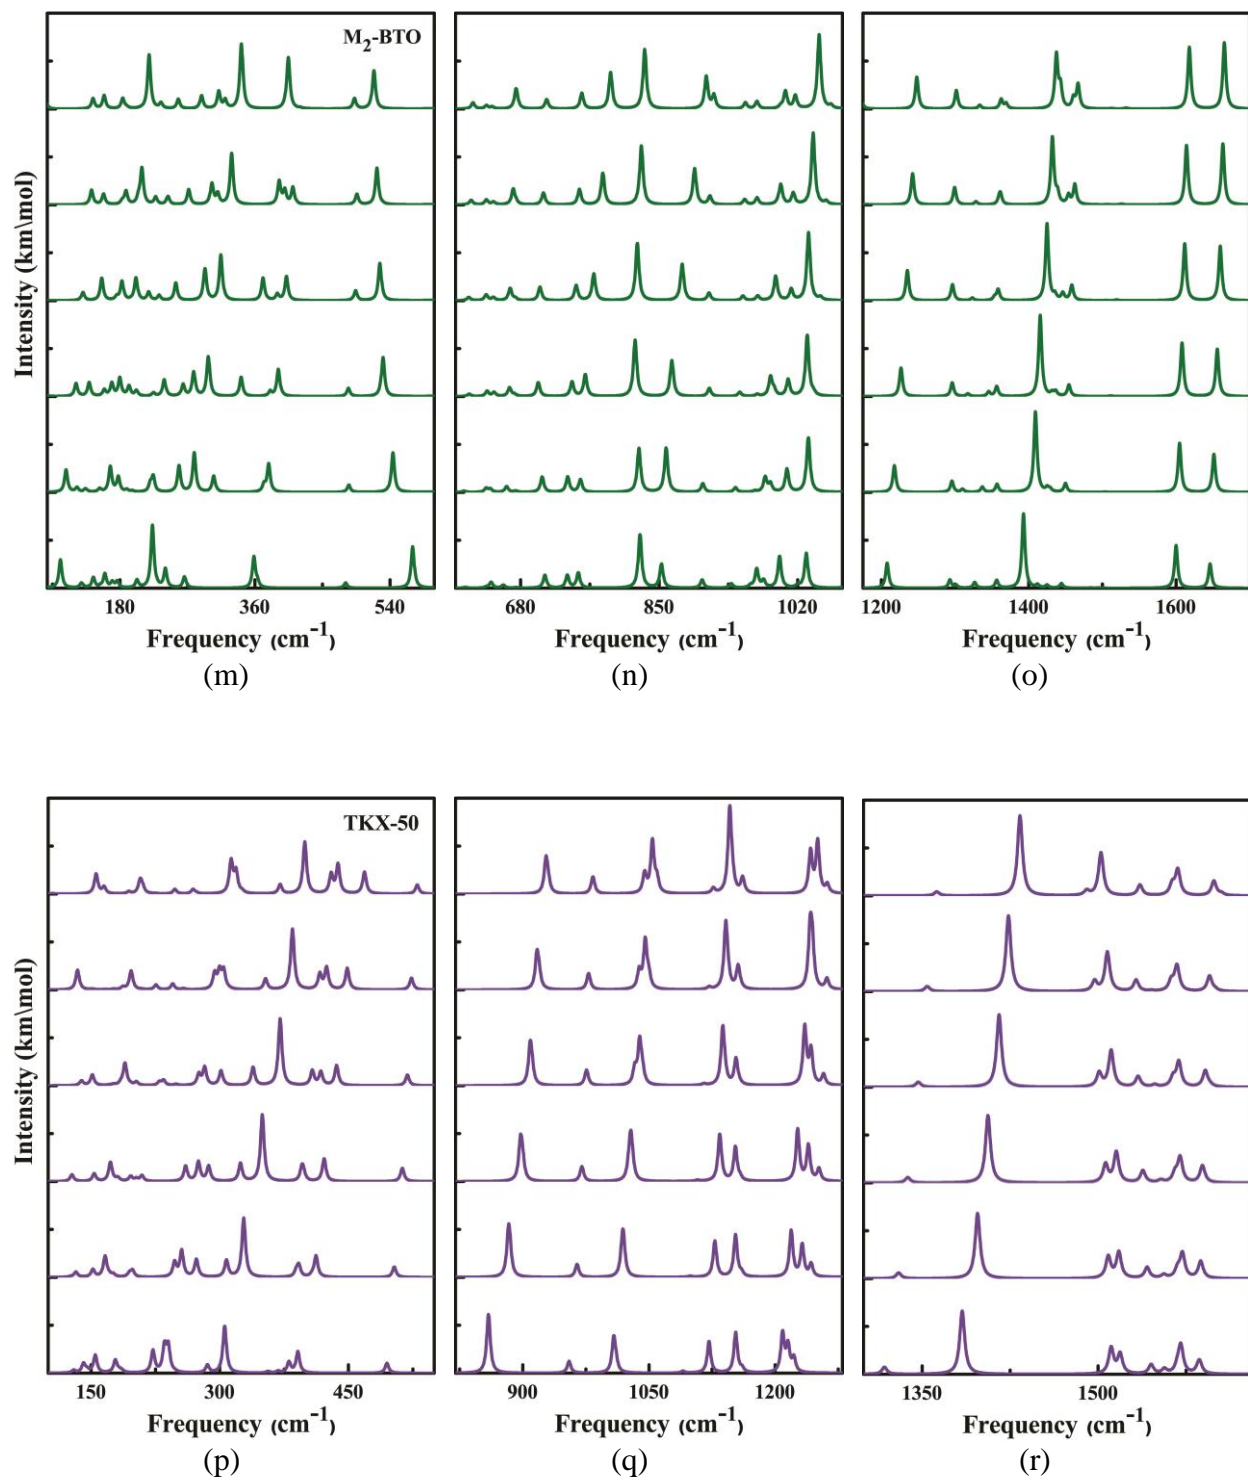

Fig. S4. Calculated IR spectra of (a-c) ABTO, (d-f) DMA-BTO, (g-i) DU-BTO, (j-l) HA-BTO, (m-o)  $M_2$ -BTO and (p-r) TKX-50 without high frequency symmetric/asymmetric stretching vibrations.
